# Supplementary material for: The Acute and Chronic Effects of Lion’s Mane Mushroom Supplementation on Cognitive Function, Stress and Mood in Young Adults: A Double-Blind, Parallel Groups, Pilot Study
Source: MDPI journal article supplement (doi:10.3390/nu15224842), 2023-11-20
Supplement: s1 [file s1]

## Supplementary Materials

### 1. Eligibility Criteria

#### Inclusion criteria

- Participants are aged 18-45 years, inclusive
- Participants self-report that they are in good health
- Participants are a native speaker of English or fluent in English (equivalent to IELTS Level 6)
- Understanding the study procedures and willing to provide informed consent to participate in the study

#### Exclusion criteria

Participants complying with at least one of the following criteria were not eligible:

- Failure to meet any one of the inclusion criteria
- Current use of prescription medication, with some specific exceptions including contraceptives, medications used in the treatment of hypo/hyperthyroidism and as required in the treatment of hayfever and mild asthma
- Have a pre-existing diagnosed medical condition/illness, with the explicit exception of controlled hypo/hyperthyroidism, mild asthma and hayfever
- Have a diagnosed neurological condition or assessed as having a learning/behavioural or neurodevelopmental difference such as dyslexia or ADHD
- Have a visual impairment that cannot be corrected with glasses or contact lenses, including colour blindness
- Food allergies/intolerances/sensitivities to any ingredients in the study products
- Are pregnant, trying to get pregnant or lactating
- Smoke tobacco, vape nicotine or use nicotine replacement products
- Have taken antibiotics within the past 4 weeks
- Have taken dietary supplements e.g. Vitamins, omega 3 fish oils etc. in the last 4 weeks (Note: participation is possible following a 4 week supplement washout prior to participating and for the duration of the study on the proviso that the supplements they are taking are out of choice and not medically prescribed or advised) With the exception here of vitamin D and iron supplements, where they have been medically advised and have been taken consistently for a minimum of 4 weeks and will be taken consistently throughout the trial
- Have any health condition that would prevent fulfilment of the study requirements (this includes non-diagnosed conditions for which no medication may be taken)
- Unable to demonstrate adequate minimal performance on lab, computer-based cognitive tasks
- Has been diagnosed with/ undergoing treatment for alcohol or drug abuse in the last 12 months
- Have been diagnosed with/ undergoing treatment for a psychiatric disorder in the last 12 months
- Excessive caffeine intake (>300 mg per day)
- Have a Body Mass Index (BMI) outside of the range 18.5-35 kg/m<sup>2</sup>

## 2. Participant characteristics at enrolment

**Table S1.** Participant characteristics at enrolment for continuous variables.  $n = 43$

| Measure                                | Mean   | SD    |
|----------------------------------------|--------|-------|
| Age (years)                            | 26.35  | 6.12  |
| Education (years)                      | 17.12  | 2.48  |
| Fruit & veg consumption (portions/day) | 3.03   | 1.59  |
| Caffeine consumption (mg/day)          | 85.92  | 73.65 |
| Systolic BP (mm/Hg)                    | 120.53 | 12.62 |
| Diastolic BP (mm/Hg)                   | 76.82  | 8.68  |
| Heart Rate (beats per minute)          | 74.45  | 13.64 |
| BMI (kg/m <sup>2</sup> )               | 24.02  | 3.42  |
| WHR                                    | .85    | .08   |

**Table S2.** Participant characteristics at enrolment for categorical variables.  $n = 43$

| Measure                                                         | Count | %         |
|-----------------------------------------------------------------|-------|-----------|
| Male/female                                                     | 20/23 | 46.5/53.5 |
| Race:                                                           |       |           |
| White                                                           | 29    | 67.4      |
| Black                                                           | 3     | 6.9       |
| Asian                                                           | 6     | 13.9      |
| Other                                                           | 5     | 11.6      |
| Wear glasses (yes/no)                                           | 6/37  | 14/86     |
| Handedness (left/right)                                         | 0/43  | 0/100     |
| Dietary habits:                                                 |       |           |
| Omnivore                                                        | 38    | 88.4      |
| Vegetarian                                                      | 3     | 7         |
| Pescatarian                                                     | 1     | 2.3       |
| Other                                                           | 1     | 2.3       |
| Highest level of education:                                     |       |           |
| Entry Level (Entry Level Certificates)                          | 0     | 0.0       |
| Level 1 (NVQ level 1, GCSE D-G, BTEC Intro)                     | 0     | 0.0       |
| Level 2 (NVQ level 2, GCSE A*-C, Young Apprenticeships, BTEC ½) | 1     | 2.3       |
| Level 3 (NVQ level 3, AS & A-levels, BTEC 3)                    | 12    | 27.9      |
| Level 4 (NVQ level 4, Cert of Higher Ed, BTEC 4)                | 1     | 2.3       |
| Level 5 (NVQ level 5, HND, HNC, Dip HE/FE, Found. Deg, BTEC 5)  | 2     | 4.7       |
| Level 6 (Bachelors Degree, GradDip, Grad Cert., BTEC 6)         | 15    | 34.9      |
| Level 7 (Masters, PGDip, PG Cert, BTEC 7)                       | 9     | 20.9      |
| Level 8 (Doctorates, BTEC 8)                                    | 3     | 7         |

### 3. Computerised cognitive tasks

*Word Presentation:* A unique set of fifteen words will be presented. Words will be selected at random from a large bank of words (MRC Psycholinguistic Database) matched for word length, frequency, familiarity and concreteness. Stimulus duration will be one second, as will be the inter-stimulus duration.

*Immediate and Delayed Word Recall:* Participants write down as many of the 15 words that they were presented during the stimulus presentation period at two time points: immediately and at the end of the cognitive assessment (delayed) This task is scored for accuracy only.

*Numeric Working Memory:* a series of numbers are displayed on the screen, one at a time. Participants are required to memorize these numbers as they appear. Once the series is complete, numbers are displayed one at a time and participants are required to indicate if each number was presented in the previous list or not.

*Choice Reaction Time:* an arrow appears on the screen pointing to the left or to the right. Participants respond with a left or right key press corresponding to the direction of the arrow. There is a randomly varying inter-stimulus interval of between 1 and 3 seconds for a total of fifty stimuli.

*Stroop:* words describing one of four colours ('RED', 'YELLOW', 'GREEN', 'BLUE') are presented in different coloured fonts on screen. In this case 60 'congruent' (word and font are the same colour) or 'incongruent' (word and font are different colours) were presented in a random order.

*Peg and Ball:* Two configurations are shown on the screen each containing three coloured balls on one of three pegs. Participants must arrange the balls on the starting configuration to match the position of balls in the goal configuration in the least number of moves possible

*Delayed Word Recognition:* A series of words are displayed on the screen, one at a time. The number of pictures, the rate at which they are displayed and the interstimulus interval can be modified. All target words shown during Word Presentation plus an equal number of decoys will be displayed on the screen one at a time. For each stimulus participants select 'Yes' or 'No' to indicate if they have seen the word before or not. The task outcomes include accuracy and reaction time.

#### 4. Response to intervention

**Table S3.** Acute Performance on the global cognitive performance scores on Day 1.

Baseline Z scores (plus standard deviation) were collected prior to dosing. Data presented from 60 minutes post dose (p.d.) assessment are Z scores (plus standard deviation). Final two columns showing test statistics (F) and associated probabilities (*p*).

|                            |     | N  | Baseline<br>Mean | SD     | 60 min p.d.<br>Mean | SD    |            | F     | <i>p</i> |
|----------------------------|-----|----|------------------|--------|---------------------|-------|------------|-------|----------|
| Day 1                      |     |    |                  |        |                     |       |            |       |          |
| Speed of<br>Performance    | LMM | 22 | 0.118            | 0.860  | 0.063               | 0.761 | Treatment  | 0.621 | 0.435    |
|                            | PLA | 21 | -0.124           | -0.713 | -0.066              | 0.798 | Treat*Time | 1.639 | 0.208    |
| Accuracy of<br>Performance | LMM | 22 | 0.048            | 0.652  | -0.006              | 0.511 | Treatment  | 0.075 | 0.786    |
|                            | PLA | 21 | -0.050           | 0.493  | 0.007               | 0.532 | Treat*Time | 0.694 | 0.410    |
| Episodic Memory            | LMM | 22 | 0.212            | 0.810  | -0.050              | 0.885 | Treatment  | 0.506 | 0.481    |
|                            | PLA | 21 | -0.222           | 0.866  | 0.052               | 0.848 | Treat*Time | 5.343 | 0.026    |

**Table S4.** Chronic performance on the global cognitive performance scores on Day 29.

Baseline Z scores (plus standard deviation) were collected prior to dosing at Day 1. Data presented Day 29 are Z scores (plus standard deviation) collected prior to dosing at Day 29. Final two columns showing test statistics (F) and associated probabilities (*p*).

|                         |     | Day 1 (V1A1) |        |       | Day 29 (V2A1) |       |            |          |       |
|-------------------------|-----|--------------|--------|-------|---------------|-------|------------|----------|-------|
|                         |     | N            | Mean   | SD    | Mean          | SD    | F          | <i>p</i> |       |
| Speed of Performance    | LMM | 21           | 0.069  | 0.850 | 0.116         | 0.906 | Treatment  | 0.875    | 0.355 |
|                         | PLA | 20           | -0.146 | 0.724 | -0.122        | 0.628 | Treat*Time | 0.063    | 0.803 |
| Accuracy of Performance | LMM | 21           | 0.014  | 0.649 | -0.046        | 0.609 | Treatment  | 0.013    | 0.910 |
|                         | PLA | 20           | -0.043 | 0.505 | 0.048         | 0.528 | Treat*Time | 0.907    | 0.347 |
| Episodic Memory         | LMM | 21           | 0.190  | 0.823 | -0.037        | 0.694 | Treatment  | 0.420    | 0.567 |
|                         | PLA | 20           | -0.173 | 0.858 | 0.039         | 1.106 | Treat*Time | 3.396    | 0.073 |

**Table S5.** Acute performance on the COMPASS cognitive task individual outcomes on Day 1.

The Baseline data are raw means (plus SD) collected prior to dosing. Data presented from the 60 post dose (p.d.) assessments are raw means (plus SD). With the final two columns showing test statistics (F) and associated probabilities (*p*).

|                                             |     | N  | Baseline |          | 60 min p.d. |          | F          | p     |       |
|---------------------------------------------|-----|----|----------|----------|-------------|----------|------------|-------|-------|
|                                             |     |    | Mean     | SD       | Mean        | SD       |            |       |       |
| Day 1                                       |     |    |          |          |             |          |            |       |       |
| Numeric Working Memory – Accuracy (%)       | LMM | 22 | 96.314   | 3.636    | 96.112      | 3.476    | Treatment  | 0.349 | 0.558 |
|                                             | PLA | 21 | 97.621   | 2.173    | 95.769      | 3.214    | Treat*Time | 2.431 | 0.127 |
| Numeric Working Memory – Overall RT (Msecs) | LMM | 22 | 861.647  | 339.566  | 833.566     | 256.784  | Treatment  | 0.346 | 0.559 |
|                                             | PLA | 21 | 802.521  | 213.750  | 800.876     | 229.697  | Treat*Time | 0.371 | 0.546 |
| Choice Reaction Time – Accuracy (%)         | LMM | 22 | 97.64    | 3.185    | 98.55       | 1.654    | Treatment  | 0.173 | 0.679 |
|                                             | PLA | 21 | 98.00    | 2.898    | 97.62       | 2.334    | Treat*Time | 2.521 | 0.120 |
| Choice Reaction Time – Overall RT (Msecs)   | LMM | 22 | 470.004  | 112.248  | 468.381     | 90.866   | Treatment  | 0.239 | 0.628 |
|                                             | PLA | 21 | 436.988  | 99.999   | 465.968     | 181.609  | Treat*Time | 1.471 | 0.232 |
| Stroop – Accuracy (%)                       | LMM | 22 | 96.438   | 5.099    | 96.061      | 4.380    | Treatment  | 0.725 | 0.400 |
|                                             | PLA | 21 | 97.142   | 3.254    | 97.221      | 2.317    | Treat*Time | 0.215 | 0.645 |
| Stroop – Overall RT (Msecs)                 | LMM | 22 | 737.669  | 164.409  | 688.053     | 119.153  | Treatment  | 0.038 | 0.846 |
|                                             | PLA | 21 | 701.832  | 152.272  | 706.931     | 150.675  | Treat*Time | 5.284 | 0.027 |
| Peg and Ball – Thinking RT (Msecs)          | LMM | 22 | 2657.32  | 1795.329 | 2765.82     | 2151.912 | Treatment  | 1.657 | 0.205 |
|                                             | PLA | 21 | 2123.33  | 995.321  | 2066.86     | 1126.737 | Treat*Time | 0.741 | 0.394 |
| Peg and Ball – Complete RT (Msecs)          | LMM | 22 | 7989.36  | 2093.397 | 7719.68     | 2437.220 | Treatment  | 1.357 | 0.251 |
|                                             | PLA | 21 | 7341.05  | 2560.635 | 6840.14     | 1773.819 | Treat*Time | 0.367 | 0.548 |
| Peg and Ball – Errors                       | LMM | 22 | 3.45     | 3.609    | 2.91        | 2.653    | Treatment  | 0.328 | 0.570 |
|                                             | PLA | 21 | 3.14     | 4.486    | 2.33        | 2.763    | Treat*Time | 0.034 | 0.854 |
| Word Recognition – Accuracy (%)             | LMM | 22 | 82.880   | 10.199   | 80.757      | 9.081    | Treatment  | 0.494 | 0.486 |
|                                             | PLA | 21 | 79.048   | 8.953    | 81.270      | 8.529    | Treat*Time | 2.013 | 0.164 |

|                                          |     |    |         |         |          |         |            |       |       |
|------------------------------------------|-----|----|---------|---------|----------|---------|------------|-------|-------|
| Word Recognition –<br>Overall RT (Msecs) | LMM | 21 | 967.088 | 323.026 | 1005.603 | 342.424 | Treatment  | 0.569 | 0.455 |
|                                          | PLA | 22 | 920.599 | 198.277 | 923.118  | 267.274 | Treat*Time | 0.660 | 0.421 |
| Immediate Word<br>Recall - Correct       | LMM | 22 | 7.795   | 2.169   | 6.523    | 2.270   | Treatment  | 0.004 | 0.950 |
|                                          | PLA | 21 | 6.762   | 2.391   | 7.476    | 2.615   | Treat*Time | 8.028 | 0.007 |
| Immediate Word<br>Recall - Errors        | LMM | 22 | 0.50    | 1.012   | 0.50     | 0.673   | Treatment  | 0.171 | 0.681 |
|                                          | PLA | 21 | 0.90    | 0.995   | 0.29     | 0.717   | Treat*Time | 5.831 | 0.020 |
| Delayed Word Recall -<br>Correct         | LMM | 22 | 5.545   | 2.595   | 4.636    | 3.270   | Treatment  | 1.184 | 0.283 |
|                                          | PLA | 21 | 4.357   | 2.511   | 4.214    | 2.813   | Treat*Time | 0.770 | 0.385 |
| Delayed Word Recall<br>– Errors          | LMM | 22 | 1.00    | 1.345   | 0.86     | 1.424   | Treatment  | 0.021 | 0.886 |
|                                          | PLA | 21 | 1.14    | 1.389   | 0.62     | 1.244   | Treat*Time | 0.828 | 0.368 |

**Table S6.** Chronic performance on the COMPASS cognitive task individual outcomes on Day 29.

All data show raw means (plus SD) collected prior to dosing at Day 1 and Day 29. Final two columns showing test statistics (F) and associated probabilities (*p*).

|                                             |     | Baseline (V1A1) |         |          | Day 29 (V2A1) |          |            |       |       |
|---------------------------------------------|-----|-----------------|---------|----------|---------------|----------|------------|-------|-------|
|                                             |     | N               | Mean    | SD       | Mean          | SD       |            | F     | p     |
| Numeric Working Memory – Accuracy (%)       | LMM | 21              | 96.138  | 3.629    | 95.662        | 4.387    | Treatment  | 0.947 | 0.337 |
|                                             | PLA | 20              | 97.502  | 2.159    | 96.002        | 3.131    | Treat*Time | 0.675 | 0.416 |
| Numeric Working Memory – Overall RT (Msecs) | LMM | 21              | 860.524 | 347.910  | 810.236       | 265.924  | Treatment  | 0.408 | 0.527 |
|                                             | PLA | 20              | 795.697 | 216.944  | 774.441       | 181.698  | Treat*Time | 0.424 | 0.519 |
| Choice Reaction Time – Accuracy (%)         | LMM | 21              | 97.52   | 3.219    | 97.81         | 6.063    | Treatment  | 0.000 | 0.988 |
|                                             | PLA | 20              | 97.90   | 2.936    | 97.40         | 2.257    | Treat*Time | 0.512 | 0.478 |
| Choice Reaction Time – Overall RT (Msecs)   | LMM | 21              | 470.824 | 114.952  | 548.239       | 333.118  | Treatment  | 1.246 | 0.271 |
|                                             | PLA | 20              | 435.107 | 102.216  | 460.363       | 152.478  | Treat*Time | 0.805 | 0.375 |
| Stroop – Accuracy (%)                       | LMM | 21              | 96.269  | 5.161    | 94.603        | 10.191   | Treatment  | 1.012 | 0.321 |
|                                             | PLA | 20              | 97.000  | 3.271    | 97.166        | 3.111    | Treat*Time | 0.784 | 0.381 |
| Stroop – Overall RT (Msecs)                 | LMM | 21              | 737.910 | 168.465  | 783.046       | 240.068  | Treatment  | 0.931 | 0.341 |
|                                             | PLA | 20              | 699.352 | 155.793  | 714.166       | 160.167  | Treat*Time | 0.957 | 0.334 |
| Peg and Ball – Thinking RT (Msecs)          | LMM | 21              | 2488.95 | 1652.135 | 2393.19       | 1784.925 | Treatment  | 0.858 | 0.360 |
|                                             | PLA | 20              | 2093.60 | 1011.563 | 2012.55       | 892.663  | Treat*Time | 0.003 | 0.854 |
| Peg and Ball – Complete RT (Msecs)          | LMM | 21              | 7761.24 | 1843.712 | 7651.19       | 2282.444 | Treatment  | 0.808 | 0.374 |
|                                             | PLA | 20              | 7342.60 | 2627.146 | 6882.95       | 2047.563 | Treat*Time | 0.704 | 0.407 |
| Peg and Ball – Errors                       | LMM | 21              | 3.62    | 3.612    | 2.67          | 2.129    | Treatment  | 0.392 | 0.535 |
|                                             | PLA | 20              | 3.15    | 4.603    | 2.25          | 1.803    | Treat*Time | 0.001 | 0.971 |
| Word Recognition – Accuracy (%)             | LMM | 21              | 82.382  | 10.173   | 81.270        | 5.722    | Treatment  | 0.498 | 0.485 |
|                                             | PLA | 20              | 79.334  | 9.087    | 81.334        | 8.475    | Treat*Time | 0.927 | 0.341 |
|                                             | LMM | 21              | 925.849 | 265.101  | 911.531       | 265.546  | Treatment  | 0.11  | 0.741 |



|                                          |     |    |         |         |         |         |            |       |       |
|------------------------------------------|-----|----|---------|---------|---------|---------|------------|-------|-------|
| Word Recognition –<br>Overall RT (Msecs) | PLA | 20 | 904.096 | 188.048 | 886.273 | 219.516 | Treat*Time | 0.006 | 0.940 |
| Immediate Word<br>Recall - Correct       | LMM | 21 | 7.738   | 2.206   | 7.690   | 1.820   | Treatment  | 0.318 | 0.576 |
|                                          | PLA | 20 | 6.950   | 2.288   | 7.750   | 2.557   | Treat*Time | 2.679 | 0.110 |
| Immediate Word<br>Recall - Errors        | LMM | 21 | 0.52    | 1.030   | 0.19    | 0.402   | Treatment  | 1.985 | 0.167 |
|                                          | PLA | 20 | 0.80    | 0.894   | 0.40    | 0.681   | Treat*Time | 0.036 | 0.851 |
| Delayed Word Recall -<br>Correct         | LMM | 21 | 5.571   | 2.657   | 5.881   | 2.334   | Treatment  | 0.160 | 0.691 |
|                                          | PLA | 20 | 4.450   | 2.539   | 6.400   | 3.081   | Treat*Time | 5.318 | 0.027 |
| Delayed Word Recall<br>– Errors          | LMM | 21 | 1.05    | 1.359   | 0.38    | 0.498   | Treatment  | 0.022 | 0.883 |
|                                          | PLA | 20 | 1.05    | 1.356   | 0.45    | 0.759   | Treat*Time | 0.021 | 0.885 |

**Table S7.** Acute performance on mood outcomes on Day 1.

Data derived from scores on the Visual Analogue Mood Scales (VAMS) and Stress Visual Analogue Scales (S-VAS). The Baseline data are raw means (plus SD) collected prior to dosing. Data presented from the 60 post dose (p.d.) assessments are raw means (plus SD). With the final two columns showing test statistics (F) and associated probabilities (*p*).

|                     |     | N  | Baseline<br>Mean | SD     | 60 min p.d.<br>MeanSD |        |            | F     | p     |
|---------------------|-----|----|------------------|--------|-----------------------|--------|------------|-------|-------|
| Day 1               |     |    |                  |        |                       |        |            |       |       |
| Alertness (VAMS)    | LMM | 22 | 58.421           | 13.366 | 59.864                | 10.745 | Treatment  | 0.076 | 0.784 |
|                     | PLA | 21 | 57.035           | 12.845 | 59.169                | 14.120 | Treat*Time | 0.113 | 0.738 |
| Stress (VAMS)       | LMM | 22 | 42.580           | 9.650  | 40.682                | 12.062 | Treatment  | 1.305 | 0.260 |
|                     | PLA | 21 | 47.202           | 10.435 | 43.726                | 15.383 | Treat*Time | 0.275 | 0.603 |
| Tranquillity (VAMS) | LMM | 22 | 63.545           | 13.823 | 64.909                | 10.225 | Treatment  | 0.828 | 0.368 |
|                     | PLA | 21 | 60.238           | 13.669 | 61.111                | 16.273 | Treat*Time | 0.029 | 0.865 |
| Stress Score (VAS)  | LMM | 22 | 40.011           | 14.698 | 40.374                | 9.982  | Treatment  | 1.117 | 0.297 |
|                     | PLA | 21 | 44.798           | 14.190 | 43.012                | 12.553 | Treat*Time | 0.346 | 0.560 |

**Table S8.** Chronic performance on mood outcomes on Day 29.

Data derived from scores on the Visual Analogue Mood Scales (VAMS), Stress Visual Analogue Scales (S-VAS) and Perceived Stress Scale (PSS) at Day Day 29. All data show raw means (plus SD) collected prior to dosing at Day 1 and Day 29. Final two columns showing test statistics (F) and associated probabilities (*p*).

|                     |     | Baseline (V1A1) |        |        | Day 29 (V2A1) |        |            |       |       |
|---------------------|-----|-----------------|--------|--------|---------------|--------|------------|-------|-------|
|                     |     | N               | Mean   | SD     | Mean          | SD     |            | F     | p     |
| Alertness (VAMS)    | LMM | 21              | 57.385 | 12.759 | 60.723        | 11.660 | Treatment  | 0.066 | 0.799 |
|                     | PLA | 20              | 57.386 | 13.075 | 58.777        | 16.064 | Treat*Time | 0.281 | 0.599 |
| Stress (VAMS)       | LMM | 21              | 42.464 | 9.871  | 39.536        | 10.865 | Treatment  | 1.154 | 0.289 |
|                     | PLA | 20              | 47.025 | 10.674 | 41.700        | 15.559 | Treat*Time | 0.353 | 0.556 |
| Tranquillity (VAMS) | LMM | 21              | 62.921 | 13.842 | 66.270        | 10.295 | Treatment  | 0.870 | 0.357 |
|                     | PLA | 20              | 60.200 | 14.023 | 61.700        | 16.482 | Treat*Time | 0.258 | 0.614 |
| Stress Score (VAS)  | LMM | 21              | 40.643 | 14.752 | 33.024        | 12.585 | Treatment  | 4.059 | 0.051 |
|                     | PLA | 20              | 45.113 | 14.483 | 42.538        | 14.852 | Treat*Time | 0.837 | 0.366 |
| PSS                 | LMM | 21              | 15.590 | 5.279  | 15.285        | 4.051  | Treatment  | 0.000 | 0.998 |
|                     | PLA | 20              | 17.000 | 7.141  | 15.750        | 5.437  |            |       |       |
